# Supplementary material for: Free and Bound Phenolics of Buckwheat Varieties: HPLC Characterization, Antioxidant Activity, and Inhibitory Potency towards α-Glucosidase with Molecular Docking Analysis
Source: PubMed Central journal article supplement (PMC6943536; doi:10.3390/antiox8120606), 2019-11-29
Supplement: antioxidants-08-00606-s001.pdf [file antioxidants-08-00606-s001.pdf]

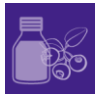**Table 1.** Identification of free and bound phenolic compounds from buckwheat samples by HPLC-DAD-ESI-qTOF/MS. FP, free phenolic; BP, bound phenolic.

| Peak No. | RT    | Molecular ion ( <i>m/z</i> ) | MS/MS fragments                        | MW  | Chemical formula                                | Compound                  | FP | BP |
|----------|-------|------------------------------|----------------------------------------|-----|-------------------------------------------------|---------------------------|----|----|
| 1        | 4.67  | 171.02 [M+H] <sup>+</sup>    | 171.02, 127.10                         | 170 | C <sub>7</sub> H <sub>6</sub> O <sub>5</sub>    | Gallic acid               | √  | √  |
| 2        | 11.25 | 137.03 [M-H] <sup>-</sup>    | 137.03, 98.02                          | 138 | C <sub>7</sub> H <sub>5</sub> O <sub>3</sub>    | 4-Hydroxybenzoic acid     | √  | √  |
| 3        | 12.72 | 353.09 [M-H] <sup>-</sup>    | 353.09, 191.01                         | 354 | C <sub>16</sub> H <sub>18</sub> O <sub>9</sub>  | 5-Caffeoylquinic acid     | √  | √  |
| 4        | 13.12 | 197.07 [M-H] <sup>-</sup>    | 197.07, 193.01                         | 198 | C <sub>9</sub> H <sub>10</sub> O <sub>5</sub>   | Syringic acid             | √  | √  |
| 5        | 15.37 | 321.10[M+H] <sup>+</sup>     | 321.10, 299.20                         | 320 | C <sub>15</sub> H <sub>12</sub> O <sub>8</sub>  | Dihydromyricetin          | -  | √  |
| 6        | 17.21 | 611.26 [M+H] <sup>+</sup>    | 611.29, 466.37, 303.21, 160.29, 137.13 | 610 | C <sub>27</sub> H <sub>31</sub> O <sub>16</sub> | Rutin                     | √  | √  |
| 7        | 19.31 | 193.06 [M-H] <sup>-</sup>    | 193.06, 134.01                         | 194 | C <sub>10</sub> H <sub>10</sub> O <sub>4</sub>  | Ferulic acid              | √  | √  |
| 8        | 20.82 | 595.17 [M+H] <sup>+</sup>    | 595.17, 287.13                         | 594 | C <sub>27</sub> H <sub>30</sub> O <sub>15</sub> | Kaempferol-3-O-rutinoside | √  | √  |
| 9        | 34.53 | 303.05 [M+H] <sup>-</sup>    | 303.05, 135.29                         | 302 | C <sub>15</sub> H <sub>10</sub> O <sub>7</sub>  | Quercetin                 | √  | √  |
| 10       | 38.87 | 270.24 [M+H] <sup>+</sup>    | 271.24, 137.12                         | 270 | C <sub>15</sub> H <sub>10</sub> O <sub>7</sub>  | Apigenin                  | √  | √  |
| 11       | 39.89 | 287.05 [M+H] <sup>+</sup>    | 287.05, 153.01                         | 286 | C <sub>15</sub> H <sub>10</sub> O <sub>6</sub>  | Kaempferol                | √  | √  |
